# Supplementary material
Source: ML conference proceedings conference paper supplement (https://proceedings.neurips.cc/paper_files/paper/2020/hash/216f44e2d28d4e175a194492bde9148f-Abstract.html)
Supplement: Supplementary file [file 216f44e2d28d4e175a194492bde9148f-Supplemental.zip]

# REINFORCEMENT LEARNING FOR CONTROL WITH MULTIPLE FREQUENCIES - SUPPLEMENTARY MATERIAL (Jongmin Lee, Byung-Jun Lee, Kee-Eung Kim)

## Appendix A Proof of Theorem 1

**Lemma 1.** For any  $\pi \in \Pi_L$ ,  $t \in \{0, \dots, L-1\}$ , and  $k \in \mathbb{N}$ , the composition of  $k$  one-step  $c$ -persistent Bellman operators  $(\bar{T}_t^\pi \dots \bar{T}_{(t+k-1) \bmod L}^\pi)$  satisfies:

$$(\bar{T}_t^\pi \dots \bar{T}_{(t+k-1) \bmod L}^\pi Q)(s, a) = \mathbb{E}_{\forall \tau, s_{\tau+1} \sim P(\cdot | s_\tau, \bar{a}_\tau)} \left[ \sum_{\tau=t}^{t+k-1} \gamma^{\tau-t} R(s_\tau, \bar{a}_\tau) + \gamma^k Q(s_{t+k}, \bar{a}_{t+k}) \mid s_t = s, \bar{a}_t = a \right]$$

where  $\bar{a}_{\tau+1} = \Gamma_{\tau+1, \bar{a}_\tau}^c(\pi(\tau+1) \bmod L(\bar{a}_\tau, s_{\tau+1}))$  for  $\tau = t, \dots, t+k-1$

*Proof.* We give a proof based on induction. For  $k = 1$ ,

$$(\bar{T}_t^\pi Q)(s, a) = \mathbb{E}_{s_{t+1} \sim P(\cdot | s_t, \bar{a}_t)} [R(s_t, \bar{a}_t) + \gamma Q(s_{t+1}, \bar{a}_{t+1}) \mid s_t = s, \bar{a}_t = a]$$

where  $\bar{a}_{t+1} = \Gamma_{t+1, \bar{a}_t}^c(\pi(t+1) \bmod L(\bar{a}_t, s_{t+1}))$

holds by the definition of one-step  $c$ -persistent Bellman operator  $\bar{T}_t^\pi$  (Eq. (5)). Now, assume the induction hypothesis for  $k$ . Then,

$$\begin{aligned} & (\bar{T}_t^\pi \dots \bar{T}_{(t+k-1) \bmod L}^\pi (\bar{T}_{(t+k) \bmod L}^\pi Q))(s, a) \\ &= \mathbb{E}_{\forall \tau, s_{\tau+1} \sim P(\cdot | s_\tau, \bar{a}_\tau)} \left[ \sum_{\tau=t}^{t+k-1} \gamma^{\tau-t} R(s_\tau, \bar{a}_\tau) + \gamma^k (\bar{T}_{(t+k) \bmod L}^\pi Q)(s_{t+k}, \bar{a}_{t+k}) \mid s_t = s, \bar{a}_t = a \right] \\ & \quad \text{where } \bar{a}_{\tau+1} = \Gamma_{\tau+1, \bar{a}_\tau}^c(\pi(\tau+1) \bmod L(\bar{a}_\tau, s_{\tau+1})) \text{ for } \tau = t, \dots, t+k-1 \\ & \quad \text{(by the induction hypothesis)} \\ &= \mathbb{E}_{\forall \tau, s_{\tau+1} \sim P(\cdot | s_\tau, \bar{a}_\tau)} \left[ \sum_{\tau=t}^{t+k-1} \gamma^{\tau-t} R(s_\tau, \bar{a}_\tau) + \gamma^k \left( R(s_{t+k}, \bar{a}_{t+k}) \right. \right. \\ & \quad \left. \left. + \gamma Q(s_{t+k+1}, \Gamma_{t+k+1, \bar{a}_{t+k}}^c(\pi(t+k+1) \bmod L(\bar{a}_{t+k}, s_{t+k+1}))) \right) \mid s_t = s, \bar{a}_t = a \right] \\ & \quad \text{where } \bar{a}_{\tau+1} = \Gamma_{\tau+1, \bar{a}_\tau}^c(\pi(\tau+1) \bmod L(\bar{a}_\tau, s_{\tau+1})) \text{ for } \tau = t, \dots, t+k-1 \\ &= \mathbb{E}_{\forall \tau, s_{\tau+1} \sim P(\cdot | s_\tau, \bar{a}_\tau)} \left[ \sum_{\tau=t}^{t+k} \gamma^{\tau-t} R(s_\tau, \bar{a}_\tau) + \gamma^{k+1} Q(s_{t+k+1}, \bar{a}_{t+k+1}) \mid s_t = s, \bar{a}_t = a \right] \\ & \quad \text{where } \bar{a}_{\tau+1} = \Gamma_{\tau+1, \bar{a}_\tau}^c(\pi(\tau+1) \bmod L(\bar{a}_\tau, s_{\tau+1})) \text{ for } \tau = t, \dots, t+k \end{aligned}$$

thus the given statement holds for  $k+1$ , which concludes the proof.  $\square$

**Theorem 1.** For all  $t \in \{0, \dots, L-1\}$ , the  $L$ -step  $c$ -persistent Bellman operator  $\bar{H}_t^\pi$  is  $\gamma^L$ -contraction with respect to infinity norm, thus  $\bar{H}_t^\pi Q_t^\pi = Q_t^\pi$  has the unique fixed point solution. In other words, for any  $Q_t^0 : \mathcal{S} \times \mathcal{A} \rightarrow \mathbb{R}$ , define  $Q_t^{n+1} = \bar{H}_t^\pi Q_t^n$ . Then, the sequence  $Q_t^n$  converges to  $t$ -th  $c$ -persistent value function of  $\bar{\pi}$  as  $n \rightarrow \infty$ .

*Proof.* By Lemma 1, for any  $t, s, a$ , and  $Q_1 : \mathcal{S} \times \mathcal{A} \rightarrow \mathbb{R}$  and  $Q_2 : \mathcal{S} \times \mathcal{A} \rightarrow \mathbb{R}$ ,

$$\begin{aligned} \left| \bar{H}_t^\pi Q_1(s, a) - \bar{H}_t^\pi Q_2(s, a) \right| &= \left| \mathbb{E}_{\forall \tau, s_{\tau+1} \sim P(\cdot | s_\tau, \bar{a}_\tau)} \left[ \gamma^L Q_1(s_{t+L}, \bar{a}_{t+L}) - \gamma^L Q_2(s_{t+L}, \bar{a}_{t+L}) \mid s_t = s, \bar{a}_t = a \right] \right| \\ & \quad \text{where } \bar{a}_{\tau+1} = \Gamma_{\tau+1, \bar{a}_\tau}^c(\pi(\tau+1) \bmod L(\bar{a}_\tau, s_{\tau+1})) \text{ for } \tau = t, \dots, t+L-1 \\ & \leq \gamma^L \max_{s', a'} \left| Q_1(s', a') - Q_2(s', a') \right| \\ \therefore \left\| \bar{H}_t^\pi Q_1 - \bar{H}_t^\pi Q_2 \right\|_\infty &\leq \gamma^L \left\| Q_1 - Q_2 \right\|_\infty \end{aligned}$$

Therefore,  $\bar{H}_t^\pi$  is  $\gamma^L$ -contraction with respect to infinity norm, and by Banach fixed-point theorem,  $\bar{H}_t^\pi Q_t^\pi = Q_t^\pi$  has the unique fixed point solution for all  $t$ .  $\square$

A deeper discussion on the Bellman operators with a periodic non-stationary policy can be found in [10, 18] though it analyzes the error in approximate policy/value iterations, rather than considering action persistence.

**Corollary 1.**  $Q_t^\pi = \bar{T}_t^\pi Q_{(t+1) \bmod L}^\pi$  holds for all  $t \in \{0, \dots, L-1\}$ , thus  $c$ -persistent value functions can be obtained by repeatedly applying 1-step  $c$ -persistent backup in a  $L$ -cyclic manner.

*Proof.*

$$\begin{aligned}
Q_t^\pi &= \bar{H}_t^\pi Q_t^\pi = \bar{H}_t^\pi \bar{H}_t^\pi Q_t^\pi = \bar{H}_t^\pi \bar{H}_t^\pi \bar{H}_t^\pi Q_t^\pi = \dots && \text{(by Theorem 1)} \\
&= \underbrace{\bar{T}_t^\pi \bar{T}_{(t+1) \bmod L}^\pi \cdots \bar{T}_{(t+L-1) \bmod L}^\pi}_{\bar{H}_t^\pi} \underbrace{\bar{T}_t^\pi \bar{T}_{(t+1) \bmod L}^\pi \cdots \bar{T}_{(t+L-1) \bmod L}^\pi}_{\bar{H}_t^\pi} Q_t^\pi \\
&= \bar{T}_t^\pi \underbrace{\bar{T}_{(t+1) \bmod L}^\pi \cdots \bar{T}_{(t+L-1) \bmod L}^\pi}_{\bar{H}_{(t+1) \bmod L}^\pi} \bar{T}_t^\pi \underbrace{\bar{T}_{(t+1) \bmod L}^\pi \cdots \bar{T}_{(t+L-1) \bmod L}^\pi}_{\triangleq Q} Q_t^\pi \\
&= \bar{T}_t^\pi \bar{H}_{(t+1) \bmod L}^\pi Q = \dots = \bar{T}_t^\pi \lim_{n \rightarrow \infty} (\bar{H}_{(t+1) \bmod L}^\pi)^n Q \\
&= \bar{T}_t^\pi Q_{(t+1) \bmod L}^\pi && \text{(by Theorem 1)}
\end{aligned}$$

□

## Appendix B Proof of Theorem 2

**Theorem 2.** Given a  $L$ -periodic, non-stationary, and deterministic policy  $\pi = (\pi_0, \dots, \pi_{L-1}) \in \Pi_L$ , let  $Q_t^\pi$  be the  $c$ -persistent value of  $\pi$  denoted in Eq. (7). If we update the new policy  $\pi^{\text{new}} = (\pi_0^{\text{new}}, \dots, \pi_{L-1}^{\text{new}}) \in \Pi_L$  by

$$\forall t, a, s', \pi_t^{\text{new}}(a, s') = \arg \max_{a'} Q_t^\pi(s', \Gamma_{t,a}^c(a')) \quad (8)$$

then  $Q_t^{\pi^{\text{new}}}(s, a) \geq Q_t^\pi(s, a)$  holds for all  $t, s, a$ .

*Proof.* For any  $t, s, a$ ,

$$\begin{aligned}
&Q_t^\pi(s, a) \\
&= \mathbb{E}_P \left[ R(s_t, \bar{a}_t) + \gamma Q_{(t+1) \bmod L}^\pi(s_{t+1}, \Gamma_{t+1, \bar{a}_t}^c(\pi_{(t+1) \bmod L}(\bar{a}_t, s_{t+1}))) \mid s_t = s, \bar{a}_t = a \right] \\
&\leq \mathbb{E}_P \left[ R(s_t, \bar{a}_t) + \gamma Q_{(t+1) \bmod L}^\pi(s_{t+1}, \Gamma_{t+1, \bar{a}_t}^c(\pi_{(t+1) \bmod L}^{\text{new}}(\bar{a}_t, s_{t+1}))) \mid s_t = s, \bar{a}_t = a \right] \quad \text{(by Eq. (8))} \\
&= \mathbb{E}_P \left[ R(s_t, \bar{a}_t) + \gamma \left( R(s_{t+1}, \bar{a}_{t+1}) + \gamma Q_{(t+2) \bmod L}^\pi(s_{t+2}, \Gamma_{t+2, \bar{a}_{t+1}}^c(\pi_{(t+2) \bmod L}(\bar{a}_{t+1}, s_{t+2}))) \right) \mid s_t = s, \bar{a}_t = a \right] \\
&\quad \text{where } \bar{a}_{t+1} = \Gamma_{t+1, \bar{a}_t}^c(\pi_{(t+1) \bmod L}^{\text{new}}(\bar{a}_t, s_{t+1})) \\
&= \mathbb{E}_P \left[ \sum_{\tau=t}^{t+1} \gamma^{\tau-t} R(s_\tau, \bar{a}_\tau) + \gamma^2 Q_{(t+2) \bmod L}^\pi(s_{t+2}, \Gamma_{t+2, \bar{a}_{t+1}}^c(\pi_{(t+2) \bmod L}(\bar{a}_{t+1}, s_{t+2}))) \mid s_t = s, \bar{a}_t = a \right] \\
&\quad \text{where } \bar{a}_{\tau+1} = \Gamma_{\tau+1, \bar{a}_\tau}^c(\pi_{(\tau+1) \bmod L}^{\text{new}}(\bar{a}_\tau, s_{\tau+1})) \text{ for } \tau = t \\
&\leq \mathbb{E}_P \left[ \sum_{\tau=t}^{t+1} \gamma^{\tau-t} R(s_\tau, \bar{a}_\tau) + \gamma^2 Q_{(t+2) \bmod L}^\pi(s_{t+2}, \Gamma_{t+2, \bar{a}_{t+1}}^c(\pi_{(t+2) \bmod L}^{\text{new}}(\bar{a}_{t+1}, s_{t+2}))) \mid s_t = s, \bar{a}_t = a \right] \\
&\quad \text{where } \bar{a}_{\tau+1} = \Gamma_{\tau+1, \bar{a}_\tau}^c(\pi_{(\tau+1) \bmod L}^{\text{new}}(\bar{a}_\tau, s_{\tau+1})) \text{ for } \tau = t \\
&= \mathbb{E}_P \left[ \sum_{\tau=t}^{t+2} \gamma^{\tau-t} R(s_\tau, \bar{a}_\tau) + \gamma^3 Q_{(t+3) \bmod L}^\pi(s_{t+3}, \Gamma_{t+3, \bar{a}_{t+2}}^c(\pi_{(t+3) \bmod L}(\bar{a}_{t+2}, s_{t+3}))) \mid s_t = s, \bar{a}_t = a \right] \\
&\quad \text{where } \bar{a}_{\tau+1} = \Gamma_{\tau+1, \bar{a}_\tau}^c(\pi_{(\tau+1) \bmod L}^{\text{new}}(\bar{a}_\tau, s_{\tau+1})) \text{ for } \tau = t, t+1 \\
&\vdots \\
&\leq \mathbb{E}_P \left[ \sum_{\tau=t}^{\infty} \gamma^{\tau-t} R(s_\tau, \bar{a}_\tau) \mid s_t = s, \bar{a}_t = a \right] \\
&\quad \text{where } \bar{a}_{\tau+1} = \Gamma_{\tau+1, \bar{a}_\tau}^c(\pi_{(\tau+1) \bmod L}^{\text{new}}(\bar{a}_\tau, s_{\tau+1})) \text{ for } \tau = t, t+1, t+2, \dots \\
&= Q_t^{\pi^{\text{new}}}(s, a)
\end{aligned}$$

where each of inequalities holds by Eq. (8), and this concludes the proof. □

## Appendix C Proof of Theorem 3

We first define the following one-step  $c$ -persistent Bellman *optimality* operator:

$$(\bar{T}_t^* Q)(s, a) \triangleq \mathbb{E}_{s' \sim P(\cdot|s, a)} \left[ R(s, a) + \gamma \max_{a'} Q(s', \Gamma_{t+1, a}^c(a')) \right] \quad (11)$$

Note that the one-step  $c$ -persistent Bellman optimality operators are  $L$ -periodic with respect to  $t$  due to the  $L$ -periodic nature of the projection operator  $\Gamma_{t, a}^c(a')$ . Therefore,  $\bar{T}_t^* Q = \bar{T}_{t+L}^* Q$  always holds for any  $t$  and  $Q$ . Then, similar to Eq. (6), we define an  $L$ -step  $c$ -persistent Bellman *optimality* operator  $\bar{H}_t^*$  by making the composition of  $L$  one-step  $c$ -persistent Bellman optimality operators:

$$\begin{aligned} (\bar{H}_0^* Q)(s, a) &\triangleq (\bar{T}_0^* \bar{T}_1^* \cdots \bar{T}_{L-2}^* \bar{T}_{L-1}^* Q)(s, a) \\ (\bar{H}_1^* Q)(s, a) &\triangleq (\bar{T}_1^* \bar{T}_2^* \cdots \bar{T}_{L-1}^* \bar{T}_0^* Q)(s, a) \\ &\vdots \\ (\bar{H}_{L-1}^* Q)(s, a) &\triangleq (\bar{T}_{L-1}^* \bar{T}_0^* \cdots \bar{T}_{L-3}^* \bar{T}_{L-2}^* Q)(s, a) \end{aligned} \quad (12)$$

Similar to  $L$ -step  $c$ -persistent Bellman operators, we can show that  $L$ -step  $c$ -persistent Bellman *optimality* operators are contraction mapping.

**Lemma 2.** *For all  $t \in \{0, \dots, L-1\}$ , the  $L$ -step  $c$ -persistent Bellman optimality operator  $\bar{H}_t^*$  is  $\gamma^L$ -contraction with respect to infinity norm, thus  $\bar{H}_t^* Q_t^* = Q_t^*$  has the unique fixed point solution. In other words, for any  $Q_t^0 : \mathcal{S} \times \mathcal{A} \rightarrow \mathbb{R}$ , define  $Q_t^{n+1} = \bar{H}_t^* Q_t^n$ . Then, the sequence  $Q_t^n$  converges to  $t$ -th  $c$ -persistent optimal value function as  $n \rightarrow \infty$ .*

*Proof.* Without loss of generality, it is sufficient to prove when  $t = 0$ .

For any  $Q_1 : \mathcal{S} \times \mathcal{A} \rightarrow \mathbb{R}$ ,  $Q_2 : \mathcal{S} \times \mathcal{A} \rightarrow \mathbb{R}$ , and  $s_0 \in \mathcal{S}$ ,  $a_0 \in \mathcal{A}$ ,

$$\begin{aligned} &|(\bar{H}_0^* Q_1)(s_0, a_0) - (\bar{H}_0^* Q_2)(s_0, a_0)| \\ &= |(\bar{T}_0^* \bar{T}_1^* \cdots \bar{T}_{L-1}^* Q_1)(s_0, a_0) - (\bar{T}_0^* \bar{T}_1^* \cdots \bar{T}_{L-1}^* Q_2)(s_0, a_0)| \\ &= \left| \mathbb{E}_{s_1 \sim P(\cdot|s_0, a_0)} \left[ R(s_0, a_0) + \gamma \max_{a_1} (\bar{T}_1^* \cdots \bar{T}_{L-1}^* Q_1)(s_1, \Gamma_{1, a_0}^c(a_1)) \right] \right. \\ &\quad \left. - \mathbb{E}_{s_1 \sim P(\cdot|s_0, a_0)} \left[ R(s_0, a_0) + \gamma \max_{a_1} (\bar{T}_1^* \cdots \bar{T}_{L-1}^* Q_2)(s_1, \Gamma_{1, a_0}^c(a_1)) \right] \right| \\ &= \gamma \left| \mathbb{E}_P \left[ \max_{a_1} (\bar{T}_1^* \cdots \bar{T}_{L-1}^* Q_1)(s_1, \Gamma_{1, a_0}^c(a_1)) - \max_{a_1} (\bar{T}_1^* \cdots \bar{T}_{L-1}^* Q_2)(s_1, \Gamma_{1, a_0}^c(a_1)) \right] \right| \\ &\leq \gamma \left| \mathbb{E}_P \left[ (\bar{T}_1^* \cdots \bar{T}_{L-1}^* Q_1)(s_1, a_1^*) - (\bar{T}_1^* \cdots \bar{T}_{L-1}^* Q_2)(s_1, a_1^*) \right] \right| \\ &\quad \text{where } a_1^* = \arg \max_a [(\bar{T}_1^* \cdots \bar{T}_{L-1}^* Q_1)(s_1, \Gamma_{1, a_0}^c(a)) - (\bar{T}_1^* \cdots \bar{T}_{L-1}^* Q_2)(s_1, \Gamma_{1, a_0}^c(a))] \\ &\leq \gamma \max_{s, a} \left| (\bar{T}_1^* \cdots \bar{T}_{L-1}^* Q_1)(s, a) - (\bar{T}_1^* \cdots \bar{T}_{L-1}^* Q_2)(s, a) \right| \end{aligned}$$

We can continue to expand the inequality in a similar way,

$$\begin{aligned} \forall s_0, a_0, |(\bar{H}_0^* Q_1)(s_0, a_0) - (\bar{H}_0^* Q_2)(s_0, a_0)| &\leq \gamma \max_{s, a} \left| (\bar{T}_1^* \cdots \bar{T}_{L-1}^* Q_1)(s, a) - (\bar{T}_1^* \cdots \bar{T}_{L-1}^* Q_2)(s, a) \right| \\ &\leq \gamma^2 \max_{s, a} \left| (\bar{T}_2^* \cdots \bar{T}_{L-1}^* Q_1)(s, a) - (\bar{T}_2^* \cdots \bar{T}_{L-1}^* Q_2)(s, a) \right| \\ &\vdots \\ &\leq \gamma^L \max_{s, a} \left| Q_1(s, a) - Q_2(s, a) \right| \\ \therefore \|\bar{H}_0^* Q_1 - \bar{H}_0^* Q_2\|_\infty &\leq \gamma^L \|Q_1 - Q_2\|_\infty \end{aligned}$$

Therefore,  $\bar{H}_t^*$  is  $\gamma^L$ -contraction with respect to infinity norm, and by Banach fixed-point theorem,  $\bar{H}_t^* Q_t^* = Q_t^*$  has the unique fixed point solution for all  $t$ .  $\square$

Therefore, the optimal  $c$ -persistent value functions (i.e. the fixed points of each  $\bar{H}_0^*, \dots, \bar{H}_{L-1}^*$ ) can be represented by  $L$  values,  $(Q_0^*, \dots, Q_{L-1}^*)$ . Also, the following lemma shows that they have the largest possible value, compared to any  $c$ -persistent value functions of any history-dependent policy  $\pi \in \Pi$ .

**Lemma 3.** *For any  $t$ , let  $\bar{H}_{t \bmod L}^* = \bar{T}_{t \bmod L}^* \dots \bar{T}_{(t+L-1) \bmod L}^*$  be  $L$ -step  $c$ -persistent Bellman optimality operator and  $Q_{t \bmod L}^*$  be its fixed point. Then, for any history-dependent policy  $\pi \in \Pi$ ,  $Q_{t \bmod L}^*(s, a) \geq Q_t^\pi(s, a)$  holds for all  $t, s, a$ .*

*Proof.* For any  $\pi \in \Pi$ ,  $t \in \mathbb{N}_0$ ,  $s \in \mathcal{S}$ ,  $a \in \mathcal{A}$ , and  $Q : \mathcal{S} \times \mathcal{A} \rightarrow \mathbb{R}$ , the following inequality holds:

$$\begin{aligned} (\bar{T}_t^\pi Q)(s_t, a_t) &\triangleq R(s_t, a_t) + \gamma \mathbb{E}_{\substack{s_{t+1} \sim P(\cdot | s_t, a_t) \\ a_{t+1} \sim \pi(\cdot | h_{t+1})}} [Q(s_{t+1}, \Gamma_{t+1, a_t}^c(a_{t+1}))] \\ &\leq R(s_t, a_t) + \gamma \max_{a'} \mathbb{E}_{s_{t+1} \sim P(\cdot | s_t, a_t)} [Q(s_{t+1}, \Gamma_{t+1, a_t}^c(a'))] \\ &= (\bar{T}_{t \bmod L}^* Q)(s_t, a_t) \end{aligned}$$

which implies

$$(\bar{T}_t^\pi \bar{T}_{t+1}^\pi \dots \bar{T}_{t+L-1}^\pi Q)(s, a) \leq (\bar{T}_{t \bmod L}^* \bar{T}_{(t+1) \bmod L}^* \dots \bar{T}_{(t+L-1) \bmod L}^* Q)(s, a) = (\bar{H}_{t \bmod L}^* Q)(s, a)$$

Therefore,  $Q_t^\pi(s, a) = \lim_{n \rightarrow \infty} (\bar{T}_t^\pi \bar{T}_{t+1}^\pi \dots \bar{T}_{t+L-1}^\pi Q)(s, a) \leq \lim_{n \rightarrow \infty} ((\bar{H}_{t \bmod L}^*)^n Q)(s, a) = Q_{t \bmod L}^*(s, a)$  holds for any  $t, s, a$  and history-dependent policy  $\pi$ , which concludes the proof.  $\square$

Now, we are ready to provide the proof of Theorem 3.

**Theorem 3.** *Starting from any  $\bar{\pi}^0 \in \Pi_c$  induced by  $L$ -periodic non-stationary deterministic policy  $\pi^0 \in \Pi_L$ , the sequence of value functions  $Q^{\bar{\pi}^n}$  and the improved policies  $\bar{\pi}^{n+1}$  induced by  $\pi^{n+1}$  converge to the optimal value function and the optimal  $c$ -persistent policy  $\bar{\pi}^*$ , i.e.  $Q_t^{\bar{\pi}^*}(s, a) = \lim_{n \rightarrow \infty} Q_{t \bmod L}^{\bar{\pi}^n}(s, a) \geq Q_t^{\bar{\pi}}(s, a)$  for any  $\bar{\pi} \in \Pi_c$ ,  $t \in \mathbb{N}_0$ ,  $s \in \mathcal{S}$ , and  $a \in \mathcal{A}$ .*

*Proof.* By Lemma 3, it is sufficient to show  $\lim_{n \rightarrow \infty} Q_t^{\bar{\pi}^n} = Q_t^*$  for all  $t \in \{0, \dots, L-1\}$ . By Theorem 2, the performance of  $c$ -persistent policy induced by  $\pi^n$  is monotonically improved during policy iteration, i.e.  $Q_t^{\bar{\pi}^{n+1}}(s, a) \geq Q_t^{\bar{\pi}^n}(s, a)$  always holds for all  $t, s, a, n$ . Now, consider when the policy is no longer improved, i.e.  $\bar{\pi}^{n+1} = \bar{\pi}^n$  and  $Q_t^{\bar{\pi}^{n+1}} = Q_t^{\bar{\pi}^n}$ . In this situation, for all  $t, s, a$ ,

$$\begin{aligned} Q_t^{\bar{\pi}^n}(s, a) &= Q_t^{\bar{\pi}^{n+1}}(s, a) \\ &= R(s, a) + \gamma \mathbb{E}_{s' \sim P(\cdot | s, a)} [Q_{(t+1) \bmod L}^{\bar{\pi}^{n+1}}(s', \Gamma_{t+1, a}^c(\bar{\pi}^{n+1}(a, s')))] \\ &= R(s, a) + \gamma \mathbb{E}_{s' \sim P(\cdot | s, a)} [Q_{(t+1) \bmod L}^{\bar{\pi}^n}(s', \Gamma_{t+1, a}^c(\bar{\pi}^{n+1}(a, s')))] \\ &= R(s, a) + \gamma \max_{a'} \mathbb{E}_{s' \sim P(\cdot | s, a)} [Q_{(t+1) \bmod L}^{\bar{\pi}^n}(s', \Gamma_{t+1, a}^c(a'))] \quad (\text{by Eq. (8)}) \end{aligned}$$

holds, and this implies that  $Q_t^{\bar{\pi}^n}$  satisfies the  $c$ -persistent Bellman optimality equation. By Lemma 2, the  $c$ -persistent Bellman optimality equation has the unique solution, thus  $Q_t^{\bar{\pi}^n} = Q_t^*$ . This concludes that  $\bar{\pi}^n$  is the optimal  $c$ -persistent policy.  $\square$

**Corollary 2.** *There always exists a  $c$ -persistent optimal policy  $\bar{\pi}^*$ , which is induced by a  $L$ -periodic, non-stationary, and deterministic policy  $\pi \in \Pi_L$ .*

*Proof.* Every policy  $\pi^n$  encountered during action-persistent policy iteration is within  $\Pi_L$ . Also, by Theorem 3,  $\bar{\pi}^n \in \Pi_c$  induced by  $\pi^n \in \Pi_L$  eventually converges to the optimal  $c$ -persistent policy, which concludes the proof.  $\square$

Corollary 2 ensures that the optimal  $c$ -persistent policy can be always found only through  $(\pi_0, \dots, \pi_{L-1}) \in \Pi_L$ , where  $\pi_t : \mathcal{A} \times \mathcal{S} \rightarrow \mathcal{A}$ .

## Appendix D Pseudo-code of Action-Persistent Policy Iteration (AP-PI)

---

### Algorithm 1 Action-Persistent Policy Iteration (AP-PI)

---

**Input:**  $\mathcal{M}$ : FA-MDP,  $c$ : action persistence vector

Randomly initialize  $\pi = (\pi_0, \dots, \pi_{L-1})$  where  $\pi_t : \mathcal{A} \times \mathcal{S} \rightarrow \mathcal{A}$  for all  $t = 0, \dots, L-1$ .  
Randomly initialize  $Q = (Q_0, \dots, Q_{L-1})$  where  $Q_t : \mathcal{S} \times \mathcal{A} \rightarrow \mathbb{R}$  for all  $t = 0, \dots, L-1$ .

**repeat**

  # Policy Evaluation

**repeat**

**for**  $t = 0, \dots, L-1$  **do**

$\forall s, a, Q_t(s, a) \leftarrow R(s, a) + \gamma \mathbb{E}_{s' \sim P(\cdot|s, a)} [Q_{(t+1) \bmod L}(s', a')]$   
      where  $a' = \Gamma_{t+1, a}^c(\pi_{(t+1) \bmod L}(a, s'))$

**end for**

**until**  $Q$  is converged

  # Policy Improvement

$\forall t, a, s', \pi_t(a, s') \leftarrow \arg \max_{a'} Q_t(s', \Gamma_{t, a}^c(a'))$

**until**  $\pi$  does not change

**Output:**  $\bar{\pi}^* = \bar{\pi}$

---

The policy  $\bar{\pi}^* = (\bar{\pi}_0^*, \dots, \bar{\pi}_{L-1}^*)$  obtained by AP-PI is executed as follows. First,  $\bar{a}$  is initialized randomly. Then, at every step  $t$ ,  $a_t = \Gamma_{t, \bar{a}}^c(\bar{\pi}_{t \bmod L}^*(\bar{a}, s_t))$  is executed, and the reward and the next state is observed:  $r_t, s_{t+1} \sim p(r_t, s_{t+1} | s_t, a_t)$ . Finally,  $\bar{a}$  is updated by  $\bar{a} \leftarrow a_t$ , and this procedure continues.

## Appendix E Pseudo-Code of Action-Persistent Actor-Critic

---

### Algorithm 2 Action-Persistent Actor-Critic (AP-AC)

---

**Input:**  $\theta_1, \theta_2, \phi$

$\theta_1 \leftarrow \theta_1$  and  $\theta_2 \leftarrow \theta_2$

$\bar{a} \sim \text{unif}(\mathcal{A})$

$\mathcal{D} \leftarrow \emptyset$

**for** each iteration **do**

**for** each environment step **do**

$a_t \sim \pi_{\phi, t}(\cdot | \bar{a}, s_t)$

$\bar{a} \leftarrow \Gamma_{t, \bar{a}}(a_t)$

$r_t, s_{t+1} \sim p(r_t, s_{t+1} | s_t, \bar{a})$

$\mathcal{D} \leftarrow \mathcal{D} \cup \{(s_t, \bar{a}, r_t, s_{t+1})\}$

**end for**

**for** each gradient step **do**

$\theta_i \leftarrow \theta_i - \lambda_Q \hat{\nabla}_{\theta_i} J_Q(\theta_i)$  for  $i \in \{1, 2\}$

$\phi \leftarrow \phi + \lambda_\pi \hat{\nabla}_\phi J_\pi(\phi)$

$\bar{\theta}_i \leftarrow \tau \theta_i + (1 - \tau) \bar{\theta}_i$  for  $i \in \{1, 2\}$

**end for**

**end for**

**Output:**  $\theta_1, \theta_2, \phi$

---

▷ Initialize parameters

▷ Initialize target network weights

▷ Initialize  $\bar{a}$  randomly

▷ Initialize a replay buffer to an empty set

▷ Sample a non-persistent action from the policy

▷ Project the sampled action using Eq. (4)

▷ Sample reward and transition from the environment

▷ Store the sampled reward and transition into replay buffer

▷ Update critic weights by minimizing Eq. (9)

▷ Update policy weights by maximizing Eq. (10)

▷ Update target network weights

▷ Optimized parameters

---

## Appendix F Supplementary Experiments

### F.1 Results on SAC

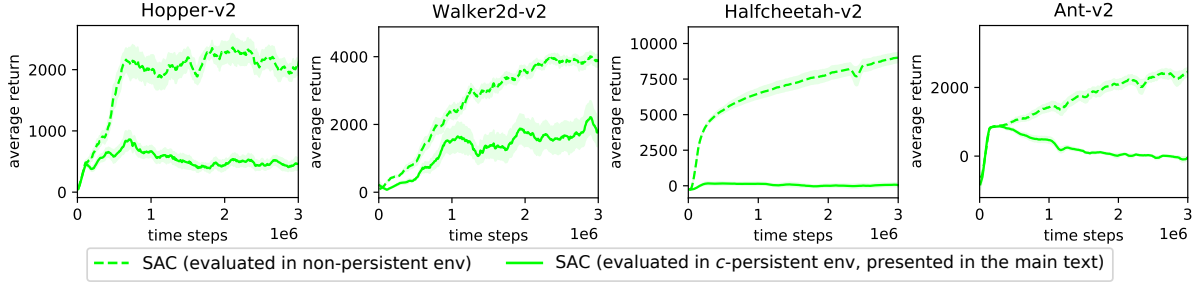

Figure 6: Results on SAC.

In Figure 5, the baseline SAC agent is trained on the standard **non-persistent** environments while being evaluated on  **$c$ -persistent** environments where the action-persistence is enforced. As shown in Figure 6<sup>1</sup>, the performance of SAC consistently improves in the non-persistent environment that the agent is trained on, but its naïve projection into a  $c$ -persistent policy completely fails since the agent *never* considers the action-persistence during training.

### F.2 Effects of varying $c$

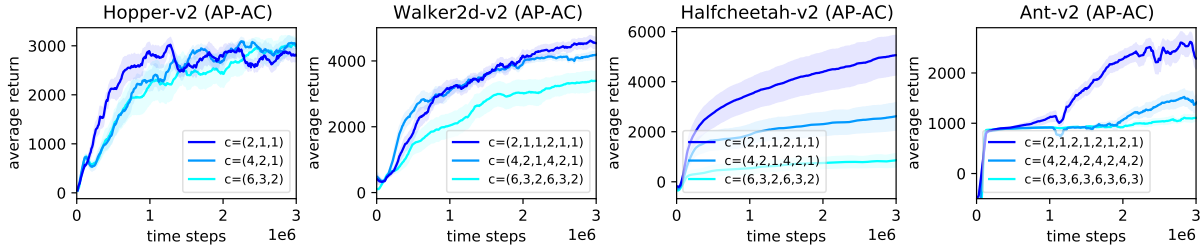

Figure 7: Effects of varying action-persistence  $c$ .

The goal of this work is to provide an efficient solution method for the *given* action-persistence  $c$ , not finding a proper  $c$  to speed up learning. Still, we conducted additional experiments to present the effects on the resulting policy of varying  $c$ . As can be seen from Figure 7, larger action persistence yields more degradation of asymptotic performance due to a limited degree of freedom of control. AP-AC consistently works well for various  $c$ 's.

<sup>1</sup>A performance gap exists compared to those reported in the original SAC paper, due to usage of different hyperparameters such as the number of hidden units per layer, i.e. 100 (ours) / 256 (original SAC paper).

## Appendix G Experimental Setup

### G.1 Computing Infrastructure

All experiments were conducted on Google Cloud Platform. Specifically, we used the compute-optimized machines (c2-standard-4) that provide 4 vCPUS and 16GB memory.

### G.2 Hyperparameters

Table 1: AP-AC Hyperparameters

| Parameter                                          | Value             |
|----------------------------------------------------|-------------------|
| optimizer                                          | Adam [6]          |
| learning rate                                      | $3 \cdot 10^{-4}$ |
| discount factor $\gamma$                           | 0.99              |
| replay buffer size                                 | $10^6$            |
| number of hidden layers (all networks)             | 2                 |
| number of hidden units per layer                   | 100               |
| number of samples per minibatch                    | 100               |
| nonlinearity                                       | ReLU              |
| target smoothing coefficient $\tau$                | 0.005             |
| target update interval                             | 1                 |
| gradient steps                                     | 1                 |
| (discrete only) temperature of relaxed categorical | 0.1               |

The hyperparameters we used in the experiments are listed in Table 1. Also, for Mujoco continuous control tasks, we used automatic entropy adjustment with the entropy target  $-\dim(\mathcal{A})$ , and for the discrete action task (i.e. traffic light control), we used the fixed entropy coefficient  $\alpha = 0.01$ . We simply tried the listed hyperparameters and not tuned them further.
